# Supplementary material for: Multistage carcinogenesis and the incidence of thyroid cancer in the US by sex, race, stage and histology
Source: Springer Nature journal article supplement (doi:10.1186/s12889-015-2108-4), 2015-08-17

**Multistage carcinogenesis and the incidence of thyroid cancer in the US by sex, race, stage and histology**

**Supplementary information**

**Rafael Meza and Joanne T. Chang**

**Table 1s. Trends of thyroid cancer incidence by gender, race, histology and stage –Joinpoint analyses 1973-2010**

|                   | Trend 1   |                    | Trend 2   |                    | Trend 3   |                   | Trend 4   |                | Trend 5   |                |
|-------------------|-----------|--------------------|-----------|--------------------|-----------|-------------------|-----------|----------------|-----------|----------------|
|                   | Period 1  | APC (95% CI)       | Period 2  | APC (95% CI)       | Period 3  | APC (95% CI)      | Period 4  | APC (95% CI)   | Period 5  | APC (95% CI)   |
| <b>Both Sexes</b> |           |                    |           |                    |           |                   |           |                |           |                |
| All Races         | 1973-1977 | 5.5 (2.4,8.7)      | 1977-1980 | -6.7 (-15.2, 2.6)  | 1980-1997 | 2.5 (2.1, 2.8)    | 1997-2010 | 6.5 (5.9, 7.0) |           |                |
| White             | 1973-1977 | 6.1 (2.8, 9.4)     | 1977-1980 | -6.1 (-14.8, 3.5)  | 1980-1996 | 2.6 (2.2, 3.0)    | 1996-2010 | 6.6 (6.1, 7.0) |           |                |
| Black             | 1973-1989 | -0.7 (-1.9, 0.6)   | 1989-2010 | 5.1 (4.2, 6.0)     |           |                   |           |                |           |                |
| Other             | 1973-1996 | -1.3 (-1.9, -0.6)  | 1996-2010 | 4.0 (2.6, 5.4)     |           |                   |           |                |           |                |
| <b>Men</b>        |           |                    |           |                    |           |                   |           |                |           |                |
| All Races         | 1973-1977 | 8.1 (2.2, 14.2)    | 1977-1980 | -9.2 (-23.8, 8.2)  | 1980-1998 | 2.1 (1.5, 2.7)    | 1998-2010 | 5.6 (4.5, 6.7) |           |                |
| White             | 1973-1977 | 8.7 (3.3, 14.4)    | 1977-1980 | -9.3 (-22.7, 6.5)  | 1980-1998 | 2.6 (2.0, 3.2)    | 1998-2010 | 5.9 (4.9, 6.9) |           |                |
| Black             | 1973-2010 | 2.5 (1.6, 3.5)     |           |                    |           |                   |           |                |           |                |
| Other             | 1973-1990 | -4.8 (-6.4, -3.1)  | 1990-2010 | 1.6 (0.2, 3.0)     |           |                   |           |                |           |                |
| <b>Women</b>      |           |                    |           |                    |           |                   |           |                |           |                |
| All Races         | 1973-1977 | 5.1 (1.7, 8.6)     | 1977-1980 | -5.5 (-14.8, 4.8)  | 1980-1996 | 2.5 (2.1, 3.0)    | 1996-2010 | 6.6 (6.0, 7.1) |           |                |
| White             | 1973-1977 | 5.8 (2.1, 9.7)     | 1977-1980 | -4.9 (-15.1, 6.6)  | 1980-1995 | 2.5 (2.0, 3.1)    | 1995-2010 | 6.8 (6.3, 7.3) |           |                |
| Black             | 1973-1988 | -1.3 (-2.7, 0.0)   | 1988-2010 | 5.3 (4.5, 6.1)     |           |                   |           |                |           |                |
| Other             | 1973-1983 | -3.7 (-5.7, -1.60) | 1983-1986 | 15.7 (-11.9, 51.9) | 1986-1991 | -7.2 (-14.9, 1.1) | 1991-2010 | 3.3 (2.5, 4.2) |           |                |
| Papillary         | 1973-1977 | 7.7 (3.9, 11.60)   | 1977-1980 | -6.6 (16.6, 4.5)   | 1980-1996 | 3.3 (2.8, 3.8)    | 1996-2010 | 6.9 (6.4, 7.5) |           |                |
| Follicular        | 1973-1999 | -0.4 (-0.8, 0.1)   | 1999-2010 | 3.3 (1.5, 5.1)     |           |                   |           |                |           |                |
| Other             | 1973-2010 | 0.2 (-0.3, 0.6)    |           |                    |           |                   |           |                |           |                |
| Localized         | 1973-1975 | 15.8 (-2.1, 36.8)  | 1975-1990 | -1.2 (-2.0, -0.4)  | 1990-2010 | 6.6 (6.1, 7.1)    |           |                |           |                |
| Regional          | 1973-1977 | 10.4 (6.1, 14.9)   | 1977-1981 | -6.1 (-11.8, 0.0)  | 1981-1985 | 12.2 (5.4, 19.5)  | 1985-1999 | 1.7 (1.0, 2.4) | 1999-2010 | 6.4 (5.5, 7.3) |
| Distant           | 1973-1986 | -2.5 (-4.8, -0.2)  | 1986-2010 | 2.6 (1.6, 3.5)     |           |                   |           |                |           |                |

apc: annual percentage change

<sup>a</sup>. significant at p<0.05

**Figure 1s. Thyroid cancer incidence period and cohort trends by gender and stage – TSCE-P-C thyroid cancer model**

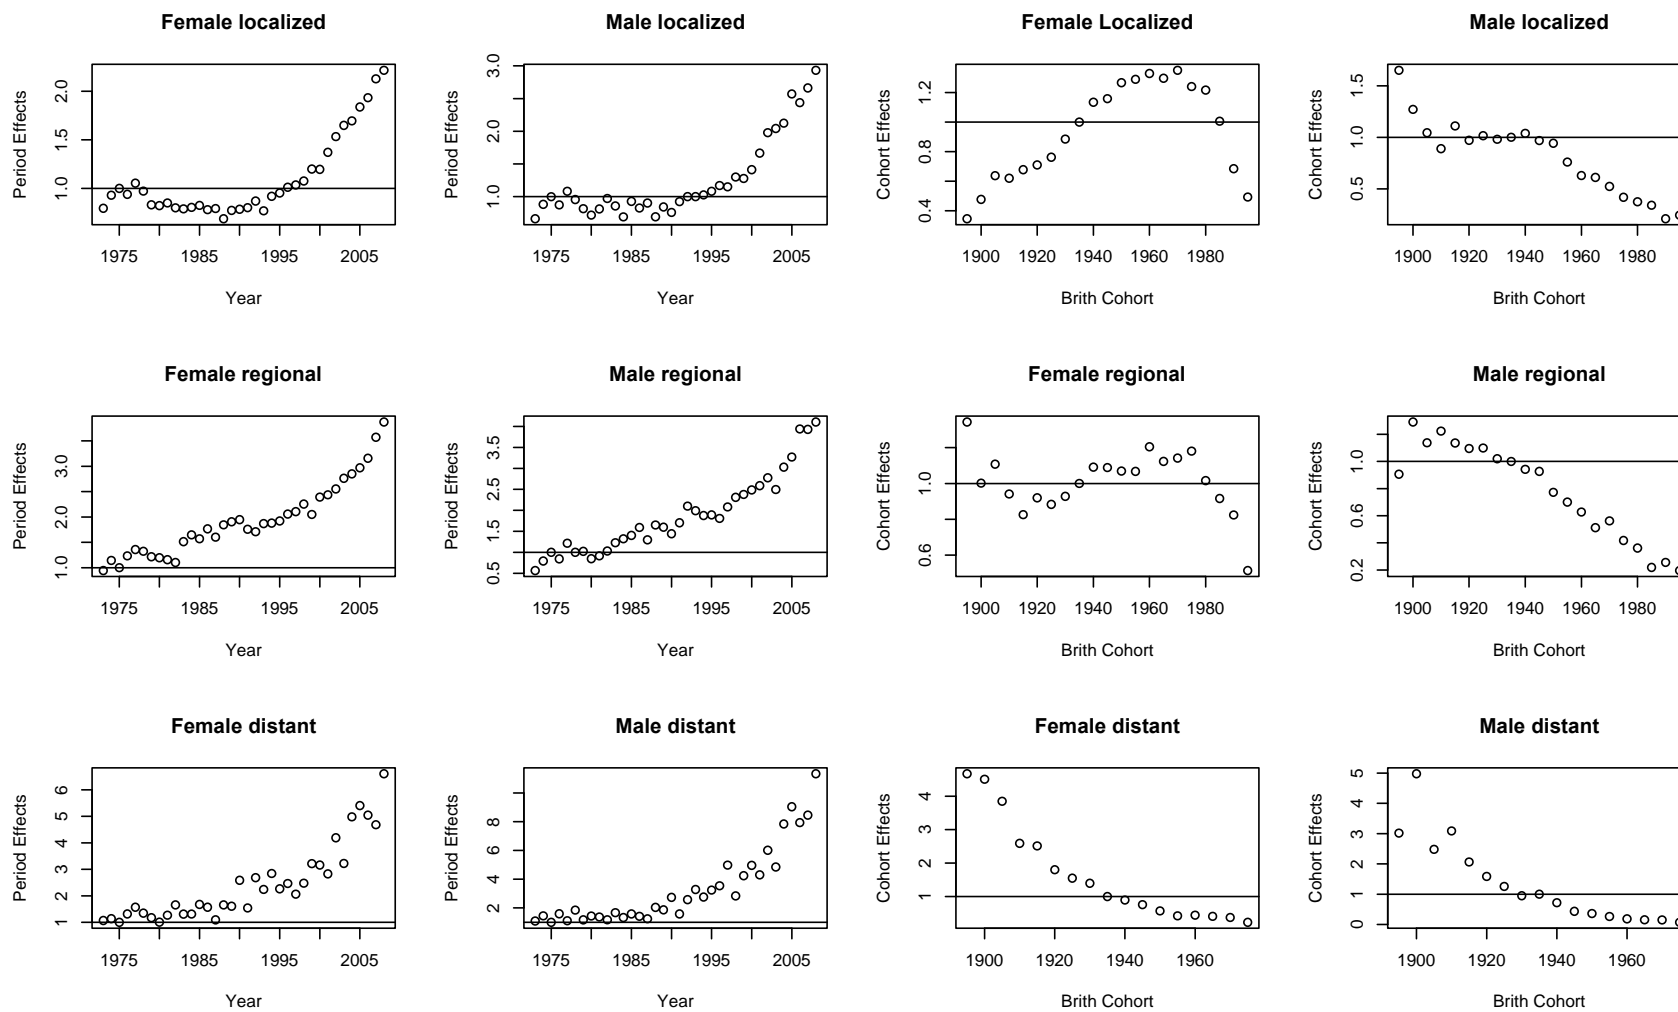

**Figure 2s. Thyroid cancer age-adjusted incidence rates by gender, race and stage**

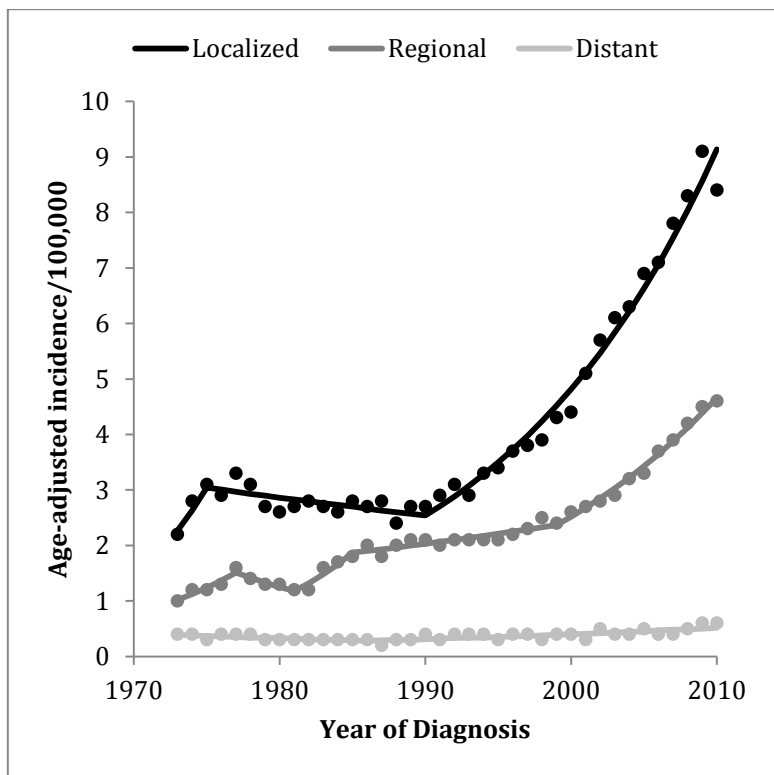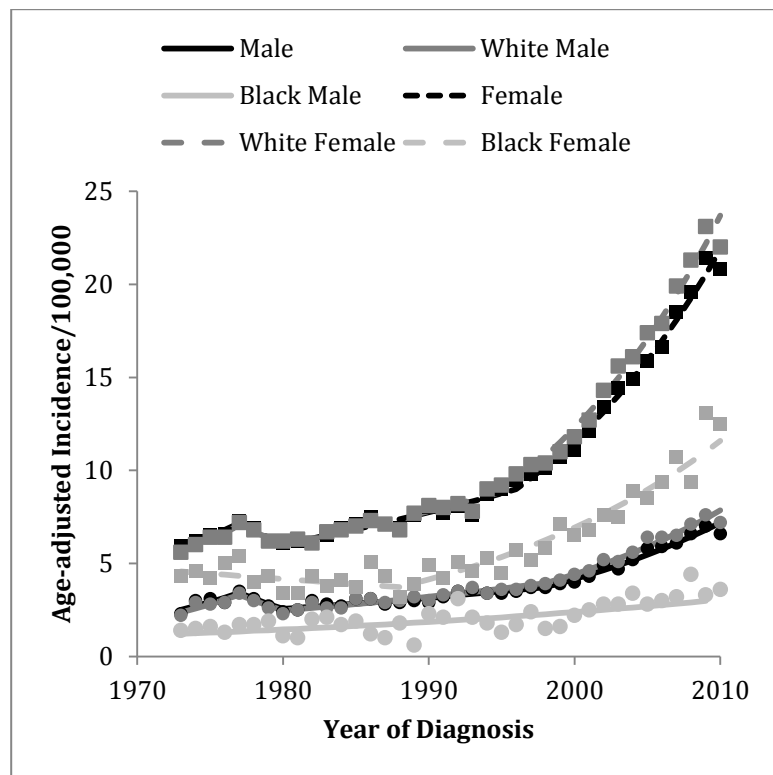

**Table 2s. Akaike information criteria (AIC\*) values for Age-Period-Cohort models relative to the AC model\*\***

|               | AIC        |            |            | AC | Relative AIC ** |          |
|---------------|------------|------------|------------|----|-----------------|----------|
|               | AC         | AP         | AP-C       |    | AP              | AP-C     |
| Females       | -174120.5  | -174571.84 | -174729.68 | 0  | -451.34         | -609.18  |
| Males         | -26887.74  | -27012.24  | -27054.12  | 0  | -124.5          | -166.38  |
| White females | -128440.88 | -128818.6  | -128970.3  | 0  | -377.72         | -529.42  |
| White males   | -19117.082 | -19195.702 | -19237.898 | 0  | -78.62          | -120.816 |
| Black females | 3743.768   | 3732.542   | 3743.278   | 0  | -11.226         | -0.49    |
| Black males   | 2964.93    | 2975.158   | 2995.378   | 0  | 10.228          | 30.448   |

AC, age-cohort; AP, age-period; AP-C, age-period-cohort.

\*  $-2 \times \log(\text{likelihood}) + 2 \times \text{number of estimated parameters}$ .

\*\* Relative values that weight the goodness of fit of the model to empirical data. The lower the AIC, the better the model fit.

**Figure 3s. Age effects by race and sex (all cases)- Age-period-cohort models**

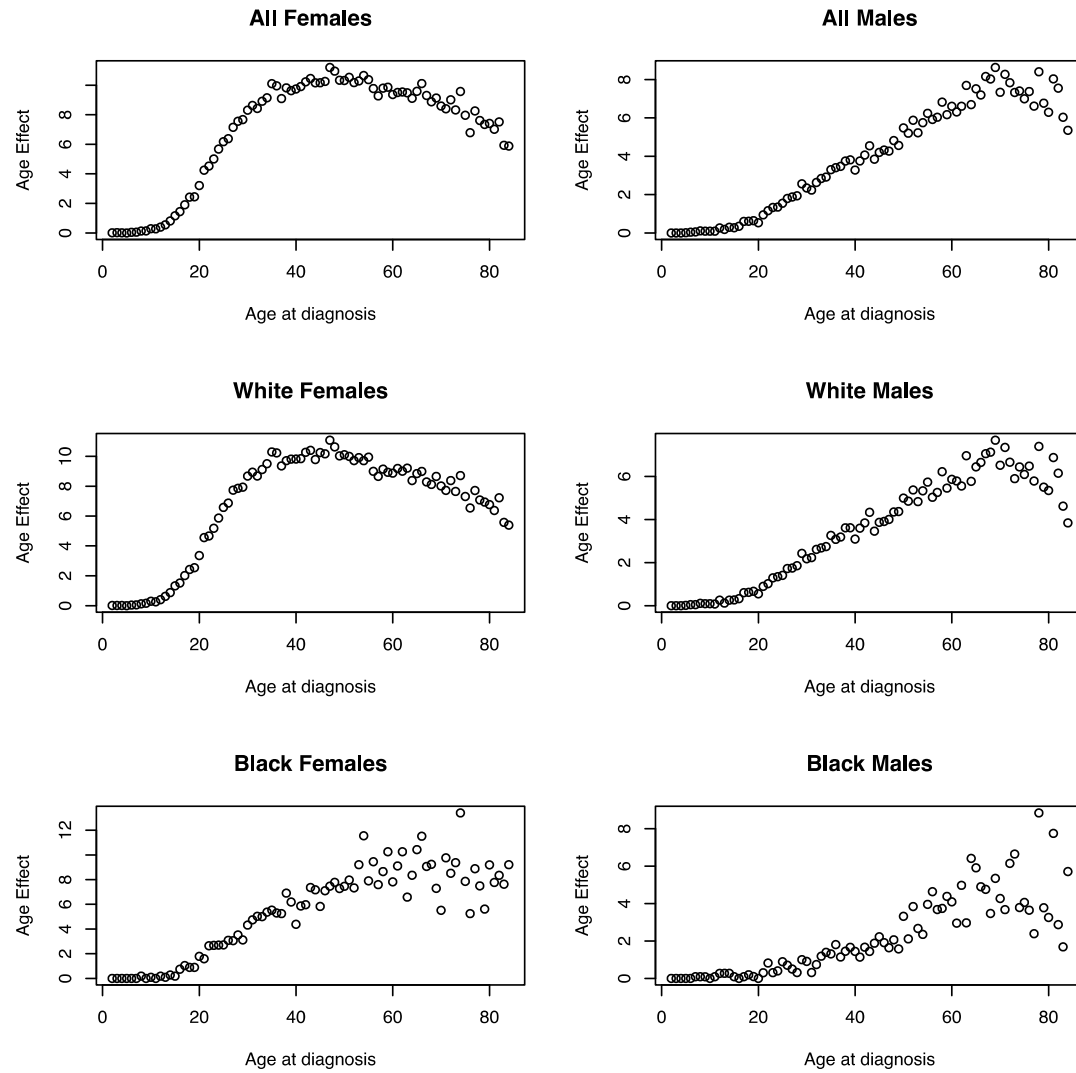

**Figure 4s. Age-effects by tumor stage (all cases)- Age-period-cohort models**

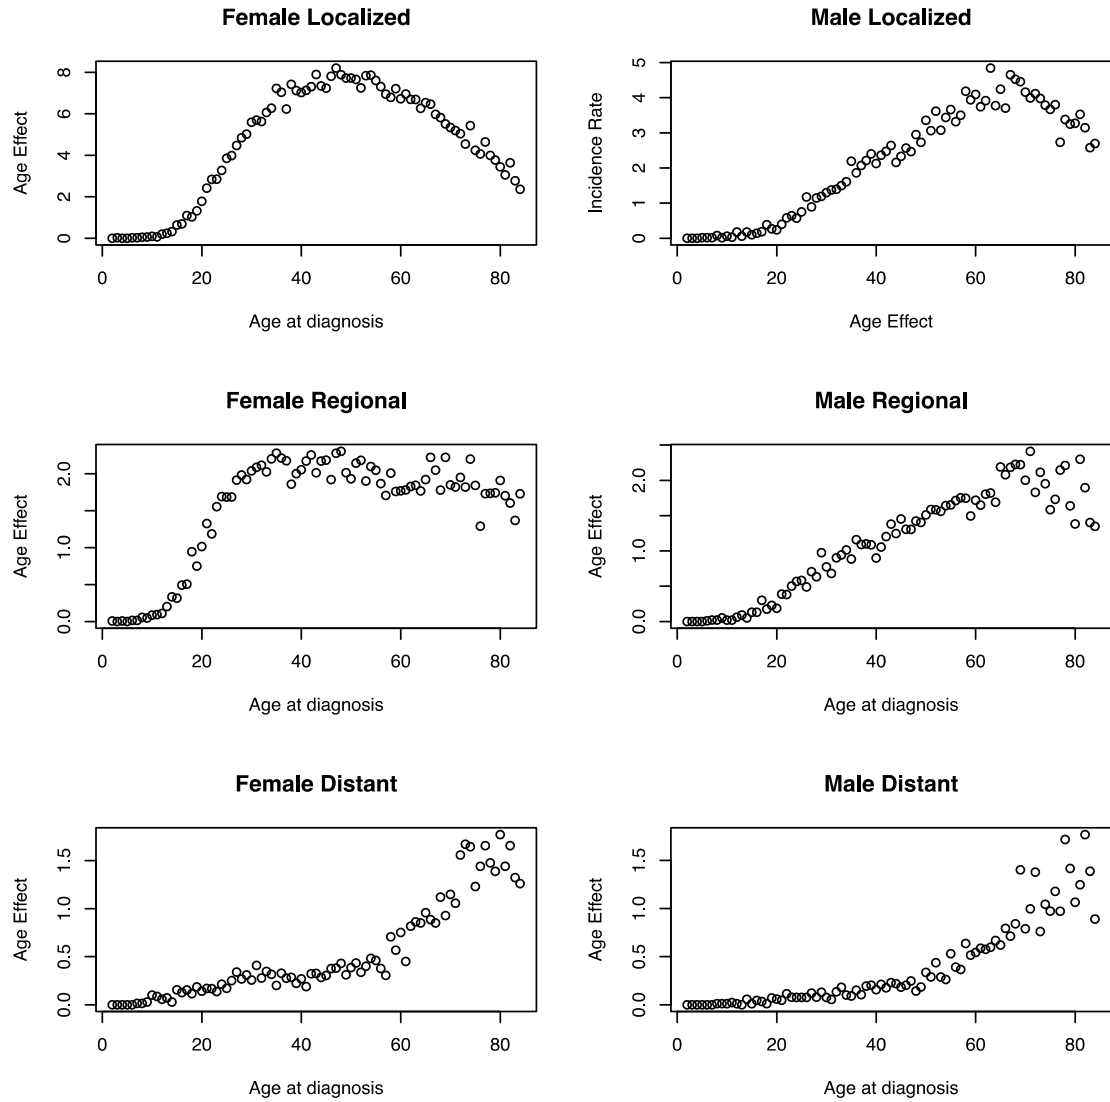

**Figure 5s. Thyroid cancer incidence period and cohort trends by gender and race – Age-period-cohort models**

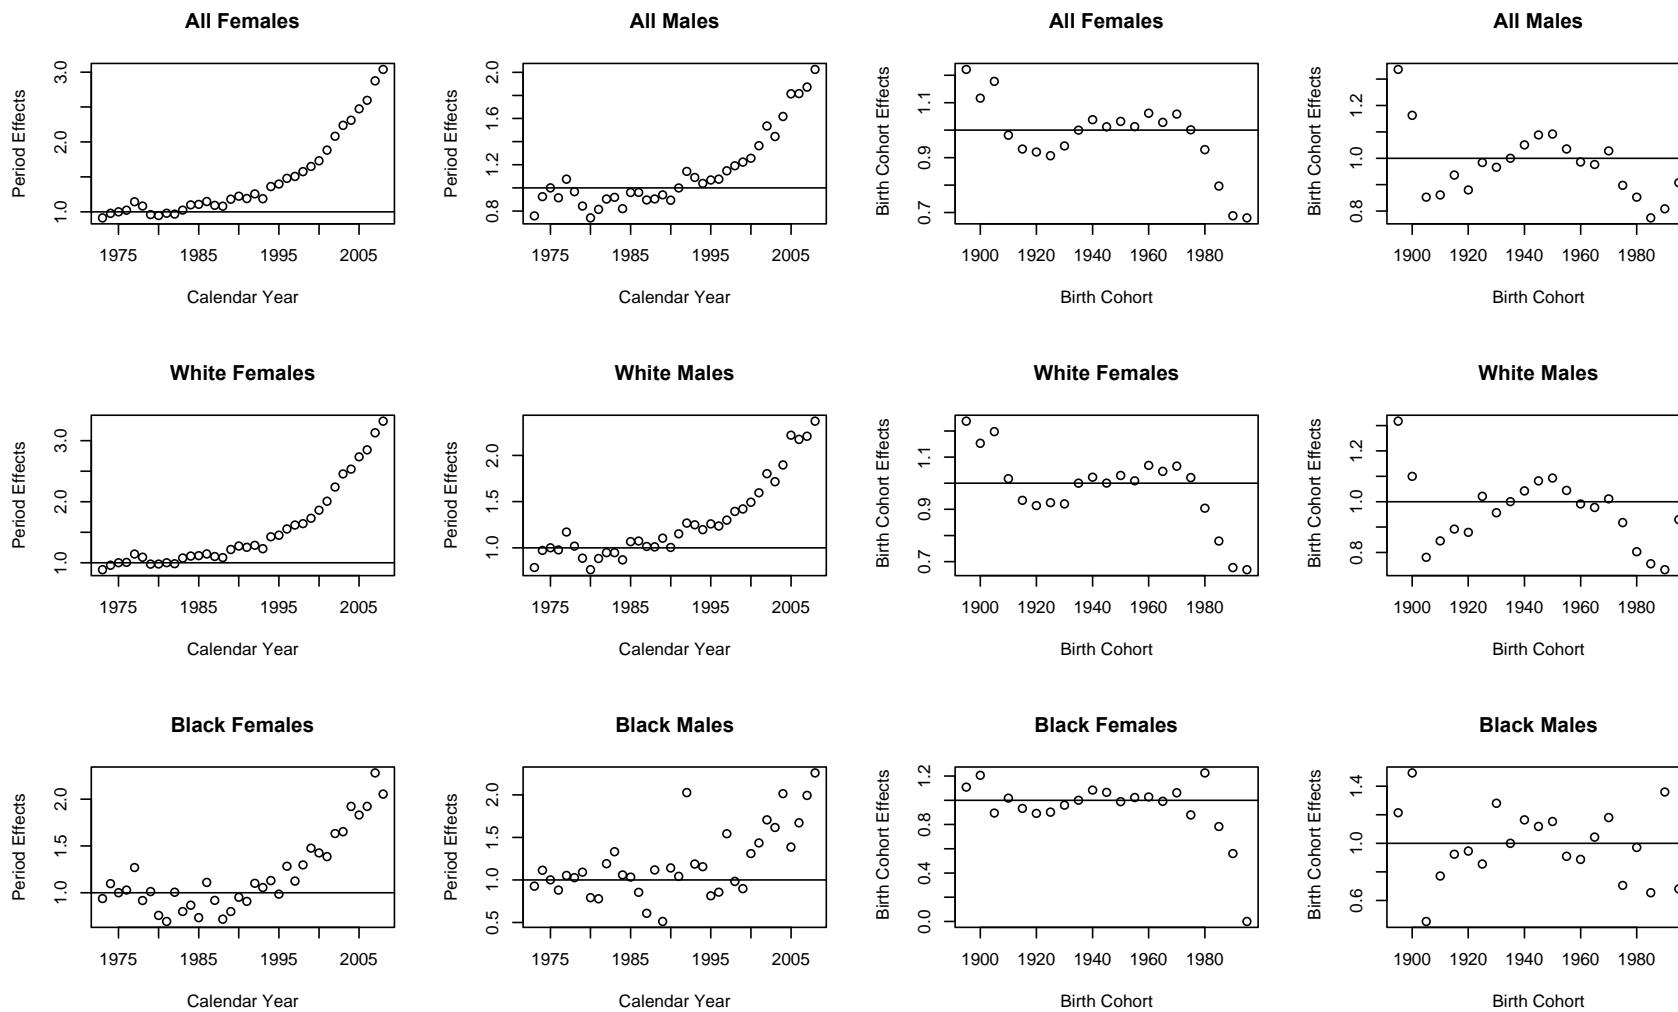



**Figure 6s. Thyroid cancer incidence period and cohort trends by gender and stage – Age-period-cohort models**

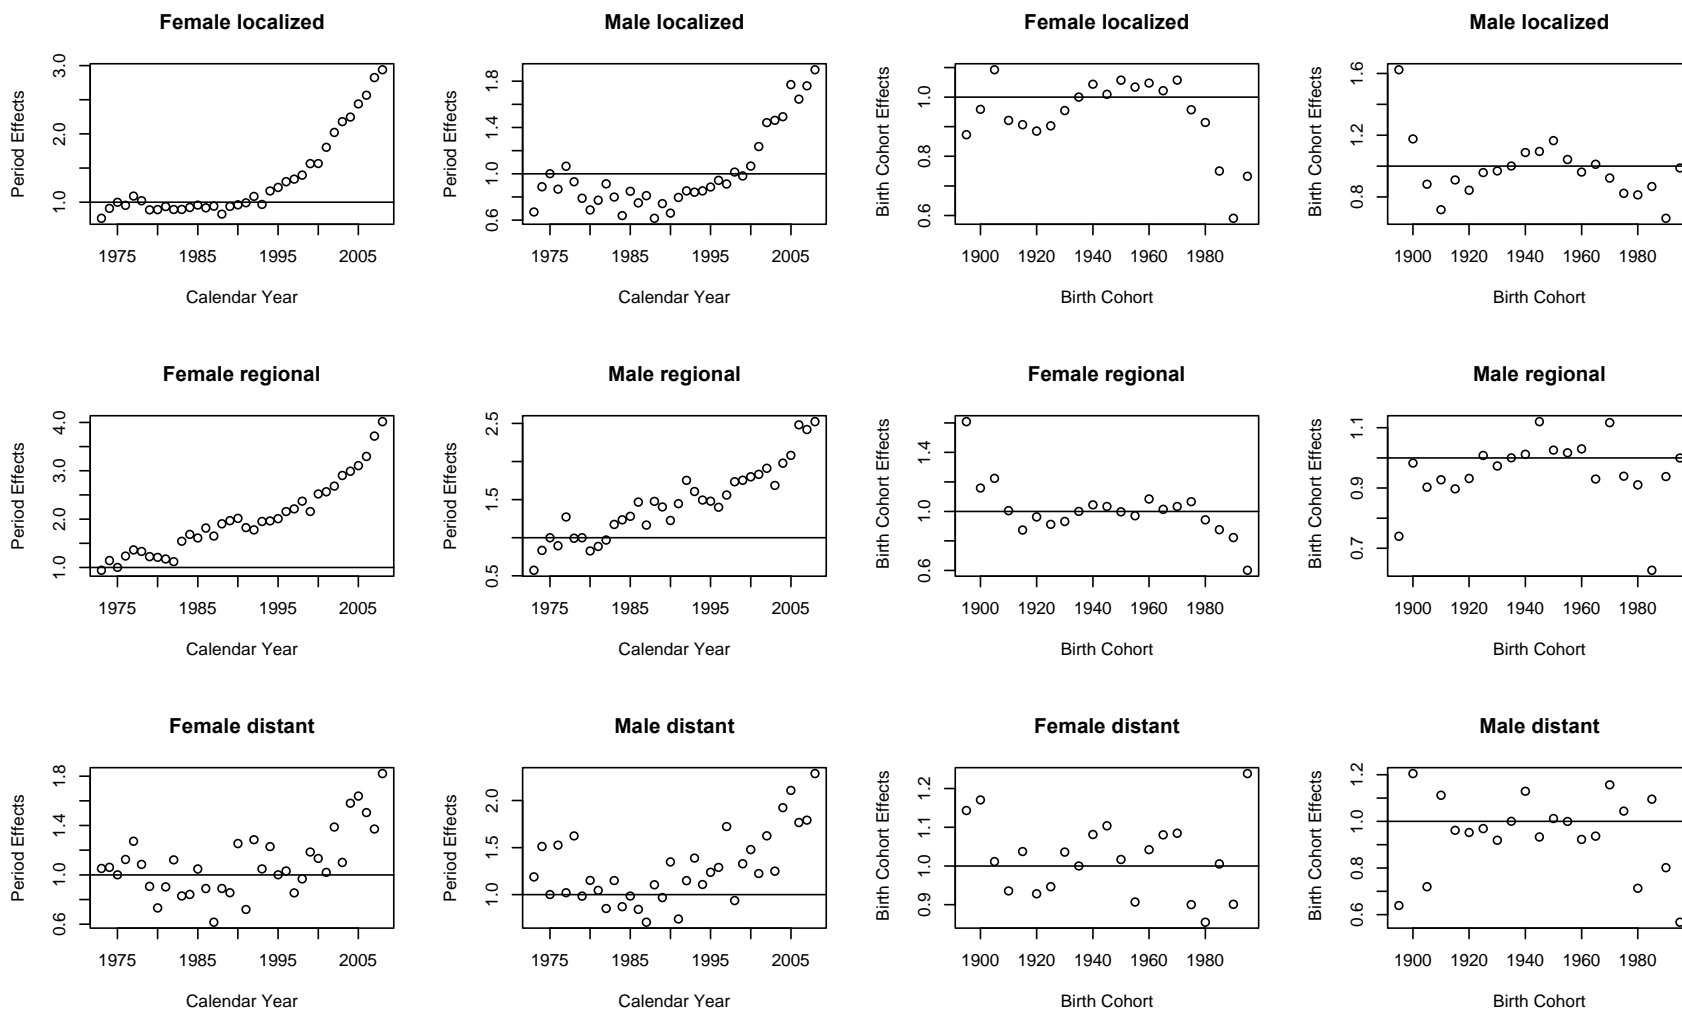

**Figure 7s. Observed versus fitted thyroid cancer incidence by gender in Whites**

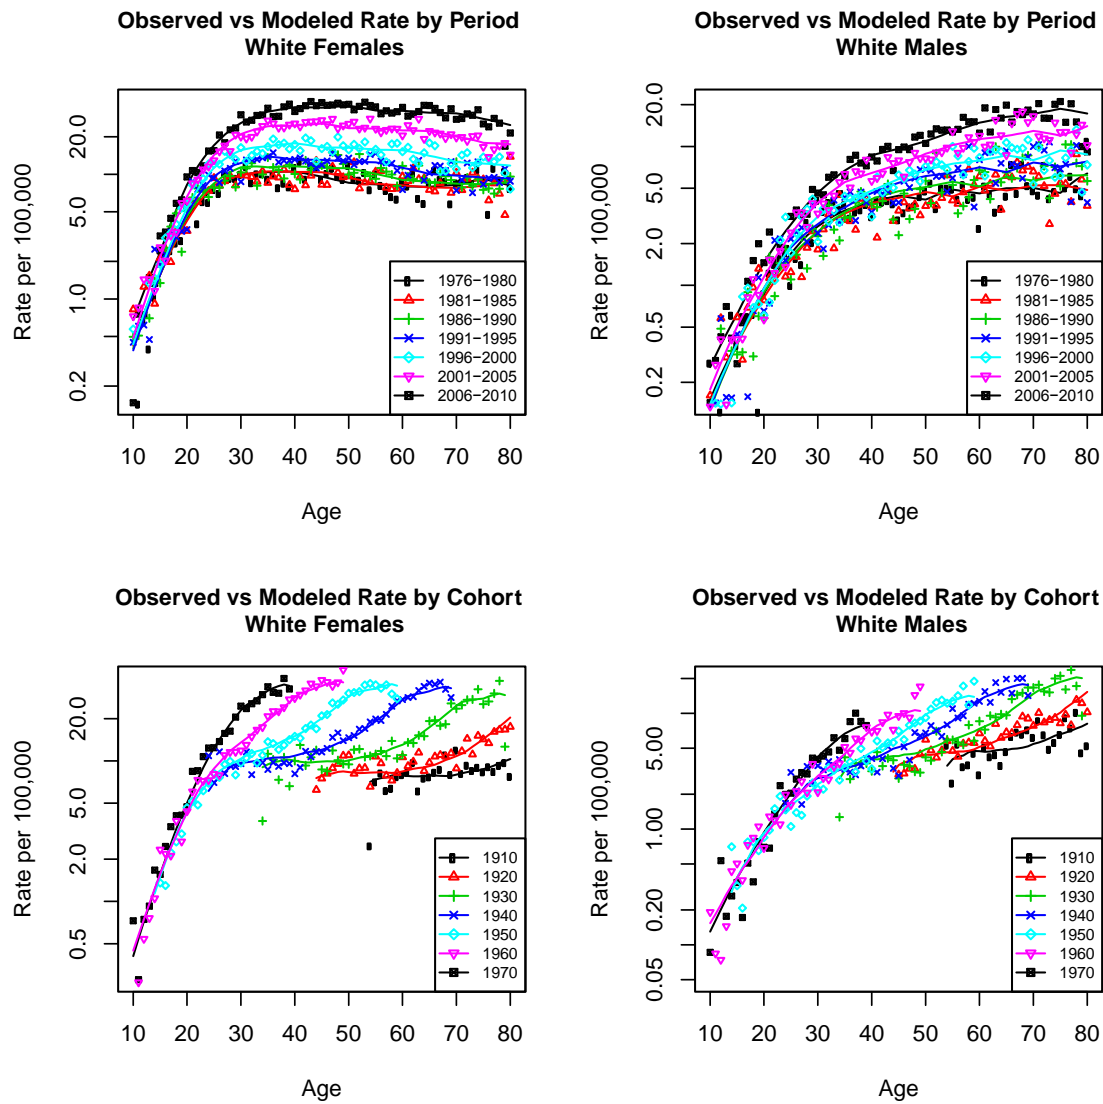

**Figure 8s. Observed versus fitted thyroid cancer incidence by gender in Blacks**

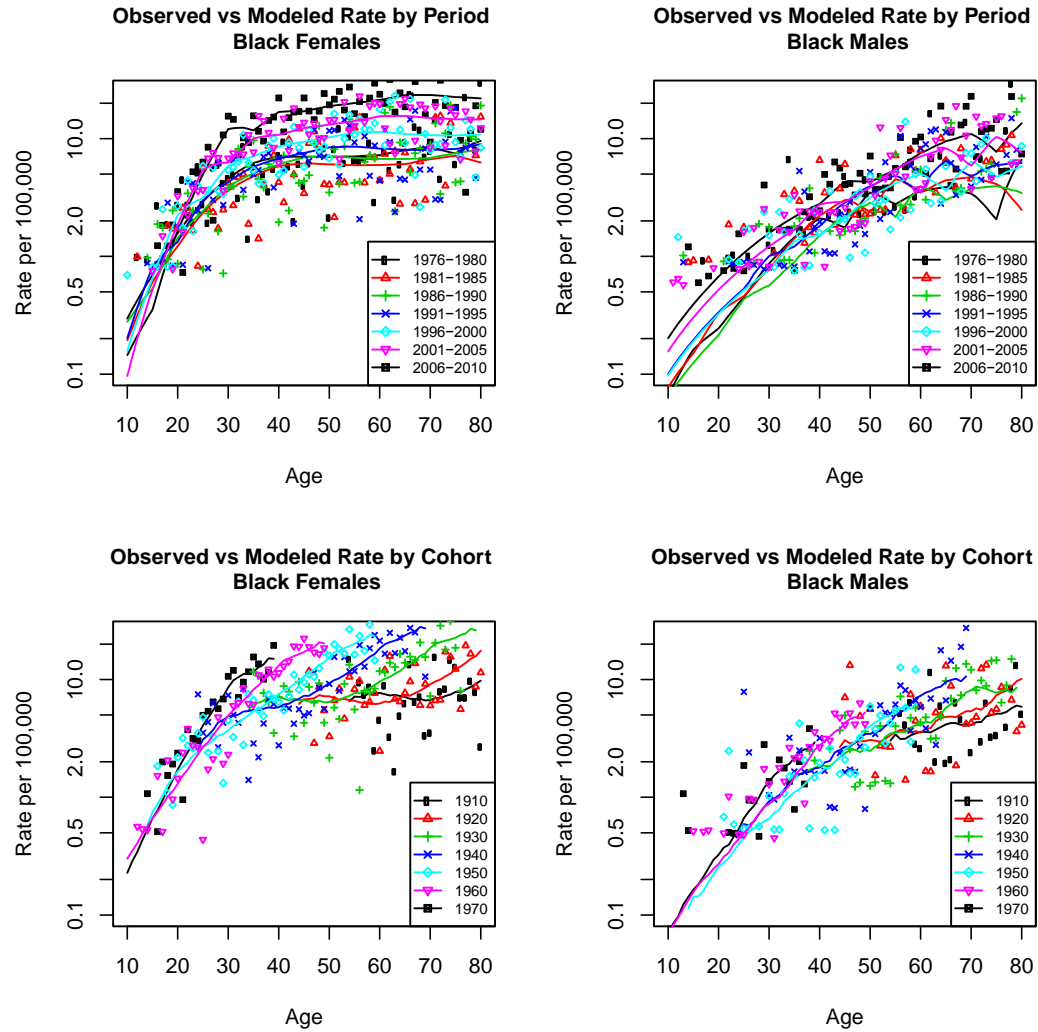

Figure 9s. *Observed versus fitted thyroid cancer incidence among papillary histology by gender*

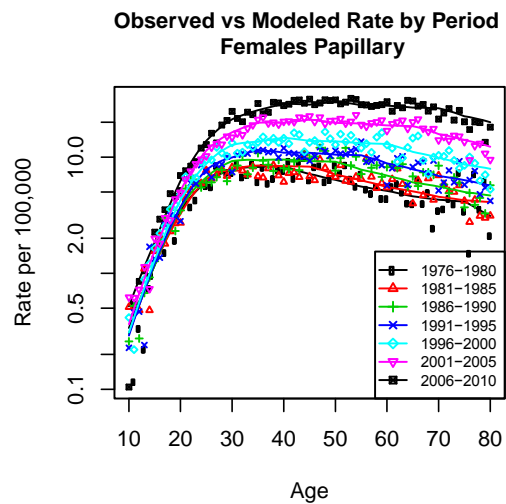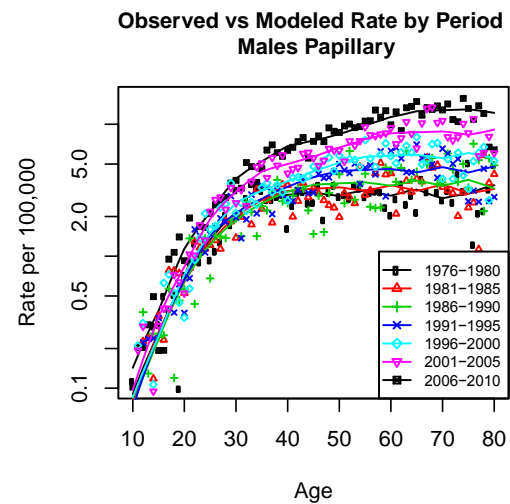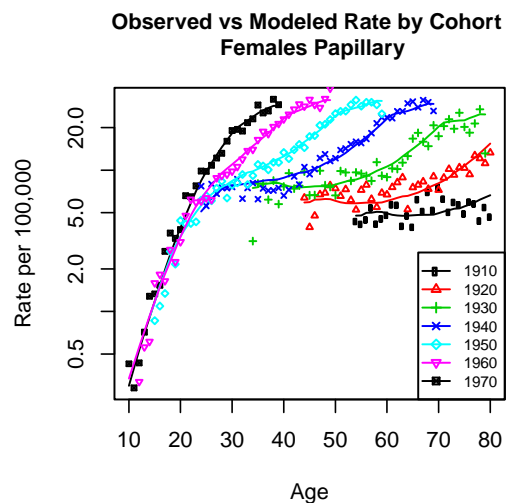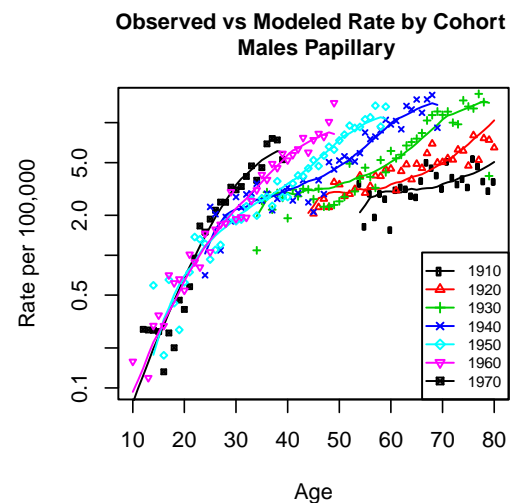

Figure 10s. *Observed versus fitted thyroid cancer incidence among follicular histology by gender*

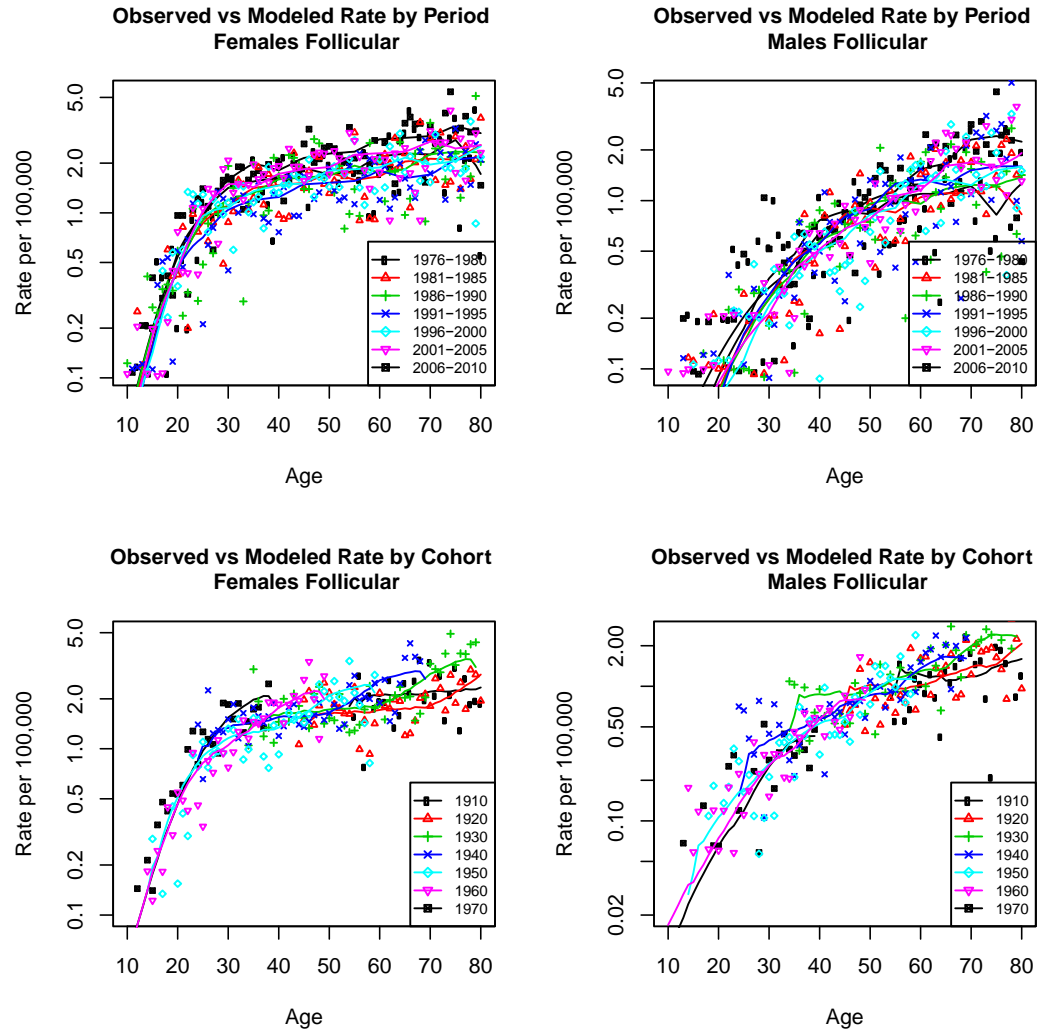

Supplement: MOESM1 [file 9750050]
